# Supplementary material for: Networked partisanship and framing: A socio-semantic network analysis of the Italian debate on migration
Source: PubMed Central journal article supplement (PMC8389375; doi:10.1371/journal.pone.0256705), 2021-08-26
Supplement: pone.0256705.s002.pdf [file pone.0256705.s002.pdf]

# Networked partisanship and framing: a socio-semantic network analysis of the Italian debate on migration - S2 Appendix

Tommaso Radicioni<sup>\*1,2</sup>, Fabio Saracco<sup>2</sup>, Elena Pavan<sup>3</sup>, Tiziano Squartini<sup>2</sup>

**1** Scuola Normale Superiore, P.zza dei Cavalieri 7, 56126 Pisa (Italy)

**2** IMT School for Advanced Studies, P.zza S. Francesco 19, 55100 Lucca (Italy)

**3** University of Trento, via Verdi 26, 38122 Trento (Italy)

\*tommaso.radicioni@sns.it

**S2 Appendix. Description of the main hashtags.** In our analysis, hashtags might be obscure to a reader who is not familiar with the Italian language and with societal and political references related with them. For this reason, in S2 Table we provide a translation of the main Italian hashtags along with a brief description of the Italian political and societal context.

1  
2  
3  
4  
5
