# Supplementary material for: Networked partisanship and framing: A socio-semantic network analysis of the Italian debate on migration
Source: PubMed Central journal article supplement (PMC8389375; doi:10.1371/journal.pone.0256705), 2021-08-26
Supplement: pone.0256705.s003.pdf [file pone.0256705.s003.pdf]

# Networked partisanship and framing: a socio-semantic network analysis of the Italian debate on migration - S3 Appendix

Tommaso Radicioni<sup>\*1,2</sup>, Fabio Saracco<sup>2</sup>, Elena Pavan<sup>3</sup>, Tiziano Squartini<sup>2</sup>

**1** Scuola Normale Superiore, P.zza dei Cavalieri 7, 56126 Pisa (Italy)

**2** IMT School for Advanced Studies, P.zza S. Francesco 19, 55100 Lucca (Italy)

**3** University of Trento, via Verdi 26, 38122 Trento (Italy)

\*tommaso.radicioni@sns.it

**S3 Appendix. Bipartite networks projection and validation.** This section provides a brief overview of the algorithm we have implemented to project our bipartite networks on a single layer (be it the one of verified users or the one of the hashtags). Generally speaking, this procedure outputs a monopartite projection by linking any two nodes, belonging to the same layer, if the number of their common neighbors is statistically significant; it can be summarized into three steps.

First, a measure quantifying the degree of similarity between two nodes is needed. Given any two nodes  $\alpha$  and  $\beta$  of the same layer  $\perp$ , their similarity is provided by the total number of co-occurrences, i.e. the number of common neighbors  $V_{\alpha\beta}^*$ , computable as  $V_{\alpha\beta}^* = \sum_{j=1}^{N_{\top}} V_{\alpha\beta}^j = \sum_{j=1}^{N_{\top}} m_{\alpha j} m_{\beta j}$ . The term  $V_{\alpha\beta}^j = m_{\alpha j} m_{\beta j}$  denotes the ‘single’ common neighbor, defined by the nodes  $\alpha$  and  $\beta$  with  $j$  belonging to the opposite layer; its value is 1 if nodes  $\alpha$  and  $\beta$  share node  $j$  as a common neighbor and 0 otherwise.

Second, the statistical significance of any two nodes similarity needs to be quantified. To this aim, observations have to be compared against a proper null model that can be defined within the mathematical framework of the so-called Exponential Random Graphs. This framework is based on a very general principle rooted in statistical physics [1], prescribing to employ the conservative benchmarks that are induced by the maximization of Shannon entropy. In mathematical notation, given the ensemble  $\mathcal{M}$  of networks and the probability  $P(\mathbf{M})$  of occurrence of a network  $\mathbf{M} \in \mathcal{M}$ , the Shannon entropy is

$$S = - \sum_{\mathbf{M} \in \mathcal{M}} P(\mathbf{M}) \ln P(\mathbf{M}) \quad (1)$$

where the sum runs over the set of all possible bipartite graphs with, respectively,  $N_{\top}$  nodes on the  $\top$  layer and  $N_{\perp}$  nodes on the  $\perp$  layer - as the real network system  $\mathbf{M}^*$ . As the entropy-maximization procedure is carried out in a constrained framework, let us define the constraints of the Bipartite Configuration Model (BiCM) [2], i.e. the null model adopted in the present paper. In this specific model, the ensemble average of the degrees of users and hashtags (i.e.  $k_i^* = \sum_{\alpha} m_{i\alpha}$ ,  $\forall i$  and  $h_{\alpha}^* = \sum_i m_{i\alpha}$ ,  $\forall \alpha$ , respectively) are considered as fixed. Upon introducing the Lagrange multipliers  $\theta$  and  $\eta$  to enforce the proper constraints and  $\psi$  to ensure the normalization of the probability, the recipe prescribes to maximize the Lagrangian function

$$\mathcal{L} = S - \psi \left[ 1 - \sum_{\mathbf{M} \in \mathcal{M}} P(\mathbf{M}) \right] - \sum_{i=1}^{N_{\top}} \theta_i [k_i^* - \langle k_i \rangle] - \sum_{\alpha=1}^{N_{\perp}} \eta_{\alpha} [h_{\alpha}^* - \langle h_{\alpha} \rangle] \quad (2)$$

with respect to  $P(\mathbf{M})$ . This leads to:

$$P(\mathbf{M}|\boldsymbol{\theta}, \boldsymbol{\eta}) = \prod_{i=1}^{N_{\top}} \prod_{\alpha=1}^{N_{\perp}} p_{i\alpha}^{m_{i\alpha}} (1 - p_{i\alpha})^{1-m_{i\alpha}} \quad (3)$$

where  $x_i \equiv e^{-\theta_i}$ ,  $y_{\alpha} \equiv e^{-\eta_{\alpha}}$  and the quantity  $p_{i\alpha} \equiv \frac{x_i y_{\alpha}}{1+x_i y_{\alpha}}$  is the probability that user  $i$  and hashtag  $\alpha$  are connected (i.e. that  $m_{i\alpha} = 1$ ).

Links independence under the BiCM implies that 1) the presence of a co-occurrence (i.e.  $m_{\alpha_j} m_{\beta_i} = 1$ ) can be described as the outcome of a Bernoulli trial whose probability reads  $f_{\text{Ber}}(m_{\alpha_j} m_{\beta_i} = 1) = p_{\alpha_j} p_{\beta_j}$  and that 2) the term  $V_{\alpha\beta}$  is the sum of independent Bernoulli trials, each one characterized by a different probability. The behavior of such a random variable is described by the Poisson-Binomial (PB) distribution. Thus, quantifying the statistical significance of the similarity of nodes  $\alpha$  and  $\beta$  amounts at computing

$$\text{p-value}(V_{\alpha\beta}^*) = \sum_{V_{\alpha\beta} \geq V_{\alpha\beta}^*} f_{\text{PB}}(V_{\alpha\beta}); \quad (4)$$

this procedure is repeated for each pair of nodes, hence obtaining  $\binom{N_{\perp}}{2}$  p-values.

Third, in order to understand which p-values are significant, a validation procedure for testing simultaneously multiple hypotheses is needed. The choice of the present paper has been directed towards the False Discovery Rate (FDR) [3] which prescribes to, first of all, sort the  $\binom{N_{\perp}}{2}$  p-values in increasing order, i.e.  $\text{p-value}_1 \leq \dots \leq \text{p-value}_n$ , and, then, identify the largest integer  $\hat{i}$  satisfying the condition  $\text{p-value}_{\hat{i}} \leq \frac{\hat{i}t}{n}$ , where  $t$  represents the single-test significance level (in our case, it is set to 0.01). All p-values that are less than, or equal to,  $\text{p-value}_{\hat{i}}$  are, thus, kept, meaning that all the corresponding node pairs are linked in the resulting monopartite projection.

## References

1. Cimini G, Squartini T, Saracco F, Garlaschelli D, Gabrielli A, Caldarelli G. The statistical physics of real-world networks. *Nature Reviews Physics*. 2019;1(1):58–71. doi:10.1038/s42254-018-0002-6.
2. Saracco F, Clemente RD, Gabrielli A, Squartini T. Randomizing bipartite networks: the case of the World Trade Web. *Scientific Reports*. 2015;5:10595. doi:10.1038/srep10595.
3. Benjamini Y, Hochberg Y. Controlling the false discovery rate: a practical and powerful approach to multiple testing. *J R Stat Soc B*. 1995;57(1):289–300.
