# Supplementary material for: Networked partisanship and framing: A socio-semantic network analysis of the Italian debate on migration
Source: PubMed Central journal article supplement (PMC8389375; doi:10.1371/journal.pone.0256705), 2021-08-26
Supplement: pone.0256705.s007.pdf [file pone.0256705.s007.pdf]

# Networked partisanship and framing: a socio-semantic network analysis of the Italian debate on migration - S1 Table

Tommaso Radicioni<sup>\*1,2</sup>, Fabio Saracco<sup>2</sup>, Elena Pavan<sup>3</sup>, Tiziano Squartini<sup>2</sup>

**1** Scuola Normale Superiore, P.zza dei Cavalieri 7, 56126 Pisa (Italy)

**2** IMT School for Advanced Studies, P.zza S. Francesco 19, 55100 Lucca (Italy)

**3** University of Trento, via Verdi 26, 38122 Trento (Italy)

\*tommaso.radicioni@sns.it

**S1 Table. Overview of the most relevant political and mediatic events concerning the Italian Twittersphere discussion about migration.**

**S1 Table. Overview of the most relevant political and mediatic events for what concerns the Italian Twittersphere discussion about migration.**

| Date                 | Event                                                                                                                                             |
|----------------------|---------------------------------------------------------------------------------------------------------------------------------------------------|
| May 18 <sup>th</sup> | Italian authorities seize the rescue vessel Sea-Watch 3 after 47 migrants have been rescued.                                                      |
| May 26 <sup>th</sup> | 2019 European elections.                                                                                                                          |
| Jun 1 <sup>th</sup>  | Sea-Watch 3 ends its seizure period.                                                                                                              |
| Jun 7 <sup>th</sup>  | The European Council adopts a partial negotiation position about migrants repatriation and new guidelines for security.                           |
| Jun 11 <sup>th</sup> | The Italian Council of Ministers approves the ‘Second Security Act’ (‘Decreto Sicurezza Bis’) against illegal immigration and NGOs.               |
| Jun 29 <sup>th</sup> | After two weeks sailing, Sea-Watch 3 enters the Italian territorial waters without any formal permission; its captain Carola Rackete is arrested. |
| Jul 19 <sup>th</sup> | After her freeing, Carola Rackete goes back to Germany.                                                                                           |
| Jul 24 <sup>th</sup> | Italian Parliament approves the ‘Second Security Act’ (‘Decreto Sicurezza Bis’).                                                                  |
| Aug 1 <sup>st</sup>  | The rescue vessel Open Arms rescues 52 migrants.                                                                                                  |
| Aug 9 <sup>th</sup>  | The League party submits a no-confidence motion against the Prime Minister Giuseppe Conte. The Italian government crisis starts.                  |
| Aug 19 <sup>th</sup> | After the refusal of the Italian government, the Spanish Prime Minister Pedro Sanchez allows Open Arms to disembark migrants in Mallorca.         |
| Sep 2 <sup>nd</sup>  | Italian authorities seize the rescue vessel Eleonore.                                                                                             |
| Sep 5 <sup>th</sup>  | The Italian government crisis ends with the Conte-bis cabinet swearing in.                                                                        |
| Sep 14 <sup>th</sup> | The rescue vessel Ocean Viking is allowed to disembark 82 rescued migrants in Lampedusa.                                                          |
| Oct 26 <sup>th</sup> | The NGOs involved in search-and-rescue operations at sea meet the new Minister of the Internal Affairs Luciana Lamorgese.                         |
| Nov 1 <sup>st</sup>  | After seven days sailing, the rescue vessel Alan Kurdi is allowed to dock in Taranto.                                                             |
