# Supplementary material for: Networked partisanship and framing: A socio-semantic network analysis of the Italian debate on migration
Source: PubMed Central journal article supplement (PMC8389375; doi:10.1371/journal.pone.0256705), 2021-08-26
Supplement: pone.0256705.s009.pdf [file pone.0256705.s009.pdf]

# Networked partisanship and framing: a socio-semantic network analysis of the Italian debate on migration - S3 Table

Tommaso Radicioni<sup>\*1,2</sup>, Fabio Saracco<sup>2</sup>, Elena Pavan<sup>3</sup>, Tiziano Squartini<sup>2</sup>

**1** Scuola Normale Superiore, P.zza dei Cavalieri 7, 56126 Pisa (Italy)

**2** IMT School for Advanced Studies, P.zza S. Francesco 19, 55100 Lucca (Italy)

**3** University of Trento, via Verdi 26, 38122 Trento (Italy)

\*tommaso.radicioni@sns.it

**S3 Table. List of the first ten verified users with the highest values of h-index (computed by considering the activity throughout the entire observation period).**

**S3 Table. List of the first ten verified users with the highest values of h-index (computed by considering the activity throughout the entire observation period).**

| Twitter user (screen name) | h-index | Discursive community |
|----------------------------|---------|----------------------|
| matteosalvinimi            | 231     | DX                   |
| GiorgiaMeloni              | 95      | DX                   |
| LegaSalvini                | 52      | DX                   |
| Linkiesta                  | 50      | CSX                  |
| Capezzone                  | 50      | DX                   |
| fattoquotidiano            | 48      | M5S                  |
| Agenzia_Ansa               | 43      | CSX                  |
| Avvenire_Nei               | 43      | MINGOs               |
| repubblica                 | 43      | CSX                  |
| CarloCalenda               | 40      | CSX                  |
